# 1 Modelling the emergence of whisker 2 barrels

3 Sebastian S. James<sup>1\*</sup>, Leah A. Krubitzer<sup>2</sup>, Stuart P. Wilson<sup>1</sup>

\*For correspondence:

[seb.james@sheffield.ac.uk](mailto:seb.james@sheffield.ac.uk) (SSJ)

4 <sup>1</sup>Department of Psychology, The University of Sheffield, Sheffield, United Kingdom.;

5 <sup>2</sup>Center for Neuroscience, The University of California, Davis, United States.

---

7 **Abstract** Brain development relies on an interplay between genetic specification and  
8 self-organization. Striking examples of this relationship can be found in the somatosensory  
9 brainstem, thalamus, and cortex of rats and mice, where the arrangement of the facial whiskers  
10 is preserved in the arrangement of cell aggregates to form precise somatotopic maps. We show  
11 in simulation how realistic whisker maps can self-organize, by assuming that information is  
12 exchanged between adjacent cells only, under the guidance of gene expression gradients. The  
13 resulting model provides a simple account of how patterns of gene expression can constrain  
14 spontaneous pattern formation to faithfully reproduce functional maps in subsequent brain  
15 structures.

---

## 17 Introduction

18 Spatial patterns in neural connectivity provide clues about the constraints under which brains  
19 evolve and develop (*Purves et al., 1992*). Perhaps the most distinctive pattern can be found in the  
20 barrel cortex of many rodent species (*Woolsey and Van der Loos, 1970*). The barrels are identifiable  
21 soon after birth in layer 4 of primary somatosensory cortex as dense clusters of thalamocortical  
22 axons, which are enclosed by borders a few neurons thick from postnatal day 3 (*Erzurumlu and*  
23 *Gaspar, 2012*). In the plane tangential to the cortical surface the barrels constitute a somatotopic  
24 map of the whiskers, with cells within adjacent barrels responding most strongly and quickly to de-  
25 flection of adjacent whiskers (*Armstrong-James et al., 1992*). Barrel patterning reflects subcortical  
26 whisker maps comprising cell aggregates called barrelettes in the brainstem and barreloids in the  
27 thalamus (*Ma, 1991; Van Der Loos, 1976*).

28 Barrel formation requires afferent input from whisker stimulation and thalamic calcium waves  
29 (*Antón-Bolaños et al., 2019*), and depends on a complex network of axon guidance molecules such  
30 as ephrin-A5 and A7 and adhesion molecules such as cadherin-6 and 8 (*Vanderhaeghen et al., 2000;*  
31 *Miller et al., 2006*). This network is orchestrated by interactions between morphogens Fgf8 and  
32 Fgf17 and transcription factors Emx2, Pax6, Sp8, and Coup-tf1 (*Shimogori and Grove, 2005; Bishop*  
33 *et al., 2000*), which are expressed in gradients that mark orthogonal axes and can be manipulated  
34 to stretch, shrink, shift, and even duplicate barrels (*Assimacopoulos et al., 2012*).

35 The barrel boundaries form a Voronoi tessellation across the cortical sheet (*Senft and Woolsey,*  
36 *1991*) (Fig. 1A), suggesting that barreloid topology is preserved in the projection of thalamocortical  
37 axons into the cortex, and that a barrel forms by lateral axon branching from an initial center-point  
38 that ceases upon contact with axons branching from adjacent centers. However, the assumption  
39 of pre-arranged center-points is difficult to resolve with the observation that axons arrive in the  
40 cortical plate as an undifferentiated bundle, *prior* to barreloid formation (*Agmon et al., 1993*).

41 Alternatively, reaction-diffusion dynamics could generate a Voronoi tessellation without pre-  
42 arranged centers, by amplifying characteristic modes in a noisy initial distribution of axon branches,

43 as a net effect of short-range cooperative and longer-range competitive interactions. Accordingly,  
44 the barrel pattern would be determined by the relative strength of these interactions and by the  
45 shape of the cortical field boundary. However, intrinsic cortical dynamics alone cannot account for  
46 the topographic correspondence between thalamic and cortical domains, the irregular sizes and  
47 specific arrangement of the barrels in rows and arcs, or the influence of gene expression gradients.

48 The center-point and reaction-diffusion models are not mutually exclusive. Pre-organized centers  
49 could bias reaction-diffusion processes to generate specific arrangements more reliably, and  
50 mechanisms of lateral axon branching may constitute the tension between cooperation and com-  
51 petition required for self-organization. However, proof that barrel patterning can emerge from an  
52 undifferentiated bundle of axons, based only on local interactions, would show that a separate  
53 stage and/or extrinsic mechanism for pre-organizing thalamocortical connections need not be as-  
54 sumed. To this end, we ask whether barrel maps can emerge in a system with reaction-diffusion  
55 dynamics, under the guidance of signalling gradients, and in the absence of pre-defined centers.

## 56 Models

57 **Karbowski and Ermentrout (2004)** developed a reaction-diffusion style model of how extrinsic sig-  
58 nalling gradients can constrain the emergence of distinct fields from intrinsic cortical dynamics.  
59 Their model defines how the density of connections  $c(x, t)$  and axon branches  $a(x, t)$  interact at  
60 time  $t$ , along a 1D anterior-posterior axis  $x$ , for  $N$  thalamocortical projections indexed by  $i$ . The  
61 model was derived from the assumption that the rates at which  $a_i$  and  $c_i$  grow are reciprocally  
62 coupled. Extending the original 1D model to simulate arealization on a 2D cortical sheet, we use  
63  $a_i(\mathbf{x}, t)$  and  $c_i(\mathbf{x}, t)$ , and model synaptogenesis as

$$\frac{\partial c_i}{\partial t} = -\alpha c_i + \beta \left( 1 - \sum_{j=1}^N c_j \right) [a_i]^k. \quad (1)$$

64 Accordingly, where the total density of synaptic connections sums to one, connections decay at  
65 rate  $\alpha$ . Otherwise the connection density increases non-linearly ( $k > 1$ ) with the density of axon  
66 branching. Axon branching is modelled as

$$\frac{\partial a_i}{\partial t} = \nabla \cdot \left( D \nabla a_i - a_i \sum_{j=1}^M \gamma_{i,j} \nabla \rho_j(\mathbf{x}) \right) - \frac{\partial c_i}{\partial t} + \chi_i. \quad (2)$$

67 The first term on the right describes the divergence (indicated by  $\nabla \cdot$ ) of the quantity in parentheses,  
68 which is referred to as the 'flux' of axonal branching. The flux represents diffusion across the  
69 cortical sheet, at rate  $D$ , and the influence of  $M$  molecular signalling fields,  $\rho(\mathbf{x})$ . The influence  
70 of a given field (indexed by  $j$ ) on a given thalamic projection (indexed by  $i$ ), is determined by  $\gamma_{i,j}$ ,  
71 which may be positive or negative in order that axons may branch in the direction of either higher  
72 or lower concentrations. Note that computing the divergence in simulation requires cells on the  
73 cortical sheet to communicate with immediately adjacent cells only (see *Materials & Methods*) The  
74 second term on the right quantifies the coupling between axon branching and synaptogenesis.  
75 Here  $\chi_i = 0$  is a placeholder.

## 76 Results

77 First we verified that all results established by **Karbowski and Ermentrout (2004)** for a 1D axis could  
78 be reproduced using our extension to a 2D cortical sheet. Using an elliptical domain,  $S$ , with  $M = 3$   
79 offset guidance gradients aligned to the longer axis,  $N = 5$  thalamocortical projections gave rise to  
80 five distinct cortical fields at locations that preserved the topographic ordering defined by the orig-  
81 inal  $\gamma$  values. However, we found that specifying  $N$  ordered areas required  $M \approx (N + 1)/2$  signalling  
82 fields. This is because localization of axon densities occurs only when projections are influenced by  
83 interactions with two or more signalling gradients that encourage migration in opposing directions.

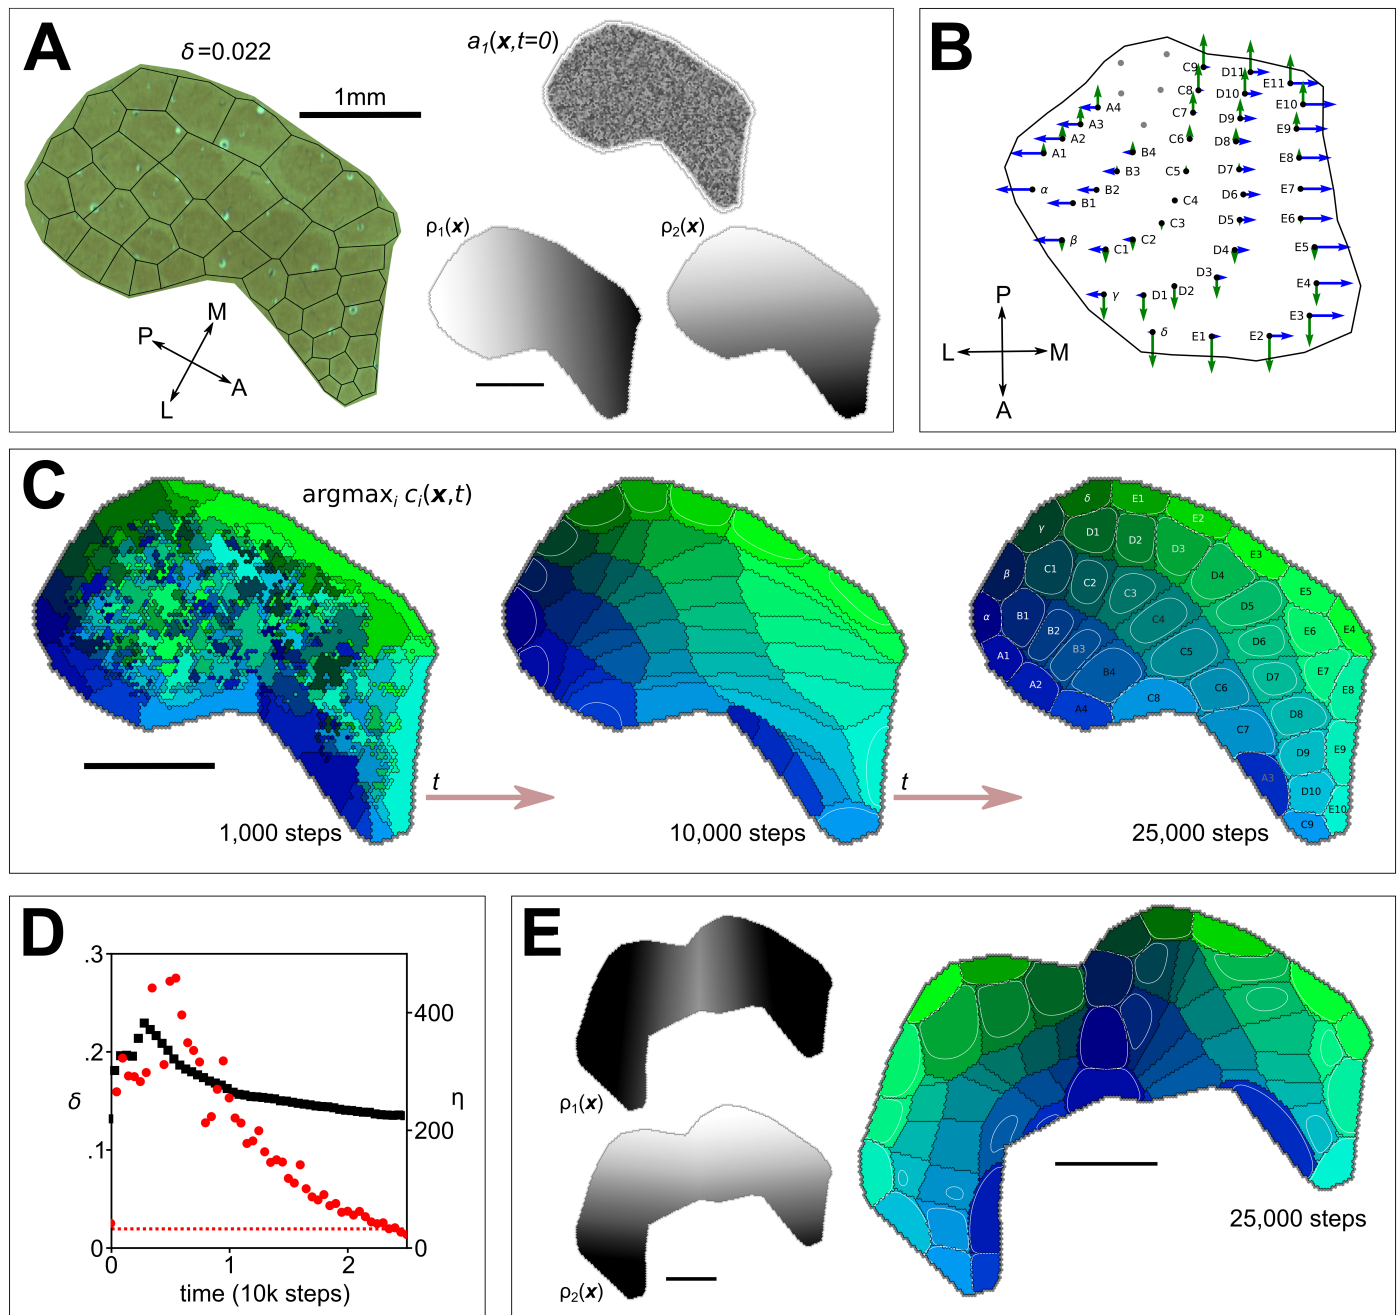

**Figure 1.** **A** Left shows a cytochrome oxidase stain obtained from rat S1 by *Zheng et al. (2001)*, with black lines to delineate barrels and to measure departure (Honda- $\delta$ ; see *Senft and Woolsey, 1991*) from a perfect Voronoi tessellation. Right shows the initial distribution of axon branching density ( $a$ ) for one thalamocortical projection, and two molecular guidance fields ( $\rho$ ). **B** The strengths of interaction  $\gamma$  with fields  $\rho_1$  and  $\rho_2$  are indicated for each of 41 projections by the lengths of green and blue arrows respectively, assuming that similar fields aligned to the posterior-anterior and medial-lateral axes in the ventroposterior medial nucleus of the thalamus are sampled at the locations of putative barreloid centers (reconstructed from *Haidarliu and Ahissar, 2001*). **C** Simulation results for parameters  $N = 41$ ,  $\alpha = 3$ ,  $\beta = 20$ ,  $k = 3$ ,  $D = 0.2$ ,  $\gamma \in \pm 2$ ,  $\epsilon = 150$  and  $\delta t = 0.0001$ . Colours indicate the thalamic projection for which the connection density is maximal, black lines delineate boundaries, and overlaid contours show  $c > 0.5$  (see Movie S1). **D** Red dots show the Honda- $\delta$  metric obtained from simulation approaching that obtained from barrels in **A** (dotted line); black squares measure the correspondence between the real and simulated barrel shapes,  $\eta$  (the product of the sum of squared differences between real and simulated centers and the sum of differences in area; units  $\text{mm}^4$ ). **E** Guidance fields and emergent barrel pattern in a Fgf8 misexpression experiment (c.f. *Assimacopoulos et al., 2012*), simulated by reflecting  $\rho_1$  at the join ( $\epsilon = 80$ ). All scale bars 1mm.

84 Note that these dynamics are quite unlike classic chemospecificity models (*Sperry, 1963*), which es-  
85 sentially assume center-points i.e., conditions in the target tissue that instruct pre-identified affer-  
86 ents to stop growing. As the number of distinct guidance fields is unlikely to approach the number  
87 of barrels, further extensions were required.

88 The term in parentheses in Eq. 1 represents competition between thalamocortical projections  
89 for a limited availability of cortical connections. To introduce competition also in terms of axon  
90 branching we redefined

$$\chi_i(\mathbf{x}, t) = -\frac{\epsilon a_i}{N-1} \sum_{j \neq i}^N a_j, \quad (3)$$

91 which reduces branching for each projection where the branches of other projections are dense.  
92 Divisive normalization keeps the axon branch density bounded on each iteration to the initial (ran-  
93 dom) density of unconnected branches at  $t = 0$

$$a_i(\mathbf{x}, t) = \iint_S [a_i(\mathbf{x}, 0) - c_i(\mathbf{x}, t)] dS \frac{a'_i(\mathbf{x}, t)}{\iint_S a'_i(\mathbf{x}, t) dS}, \quad (4)$$

94 where prime symbols indicate the use of intermediate values computed from Eqs. 1–3 at time  $t - \delta t$   
95 ( $\delta t$  is the time represented by one simulation step). Note that this operation is local to individual  
96 afferent projections.

97 The only differences between thalamic projections are their strengths of interaction with the  
98 guidance fields,  $\gamma$ , hence any reliable differences between emergent cortical fields must be due  
99 to differences in these values only. We speculate that the contribution of a given ephrin field,  
100 to the velocity at which a projection migrates across the cortical subplate, is determined by the  
101 concentration of a similar molecule at its thalamic origin, i.e., the putative barreloid center. As  
102 such, two orthogonal linear thalamic gradients were defined, from which 41 pairs of  $\gamma$  values were  
103 sampled, at the coordinates of 41 barreloid centers recreated from *Haidarliu and Ahissar (2001)*  
104 (Fig. 1B).

105 A cortical boundary enclosing 41 corresponding barrels was traced from a cytochrome oxidase  
106 stain from *Zheng et al. (2001)*, and Eqs. 1–4 were solved for  $N = 41$  projections on the resulting  
107 domain, using  $M = 2$  linear signalling gradients aligned with the anterior-posterior and medial-  
108 lateral axes. From random initial conditions for  $a(\mathbf{x}, 0)$  and  $c(\mathbf{x}, 0)$ , a clear Voronoi-like tessellation  
109 emerged (Fig. 1C; see Movie S1). A reduction in the Honda delta metric (see *Senft and Woolsey,*  
110 *1991*) confirmed that a ‘good’ Voronoi pattern emerged within  $\approx 3000$  iterations (Fig. 1D). A measure  
111 of the difference in shape between real and simulated barrels revealed a strong correspondence  
112 (see Fig. 1D).

113 To further investigate the interplay of genetic and intrinsic mechanisms we simulated a seminal  
114 barrel duplication experiment (*Shimogori and Grove, 2005*), first by solving on a cortical domain  
115 comprising two separate, identically shaped cortical boundaries. In this case one distinct cortical  
116 field per thalamic projection emerged, within one of the two boundaries only, i.e., no duplication.  
117 However, merging the two fields to create an extended mirror-symmetric boundary shape, with an  
118 anterior-posterior guidance field reflected at the join, gave rise to two mirror-symmetrical barrel  
119 fields comprising  $2N$  barrels, i.e., two cortical fields for each thalamic projection (Fig. 1E). Together  
120 these results suggest that by the misexpression of Fgf8, *Shimogori and Grove (2005)* effectively  
121 created one large barrel field rather than two distinct cortical fields.

## 122 Discussion

123 The present results suggest that the key requirements for the emergence of realistic barrel pat-  
124 terning are i) at each cortical location thalamocortical projections compete for a limited number  
125 of available synaptic connections (Eqs. 1–2), ii) at each location the branching rate of a given pro-  
126 jection is reduced by the density of other projections (Eq. 3), and iii) the branch density of each  
127 projection is conserved over time (Eq. 4).

128 The emergence of barrels in simulation required competition between thalamic projections in  
 129 terms of synaptic connectivity and also competition in terms of cortical space, as represented by  
 130  $\chi$ , with an implicit requirement for a self/other identifier amongst projections. This latter form of  
 131 competition may account for the absence of barrels in rodents with larger brains, such as capybara,  
 132 for which competition for space is presumably weaker (*Woolsey et al., 1975*). Hence, irrespective  
 133 of whether barrels are necessary for adaptive whisker function, the emergence of somatotopically  
 134 ordered modular structures may be an inevitable consequence of local competition for cortical  
 135 territory driven by input from an array of discrete sensory organs (*Purves et al., 1992*).

136 It is important to emphasize that the formulation of the model is entirely local, insofar as simu-  
 137 lation requires no information to be communicated from a given cortical grid cell to any but those  
 138 immediately adjacent (via diffusion). Hence the simulations demonstrate how a self-organizing  
 139 system, constrained by genetically specified guidance cues and by the shape of the cortical field  
 140 boundary, can faithfully reproduce an arrangement of cell aggregates in one neural structure as a  
 141 topographic map in another.

142 Moreover, the present results confirm that somatotopic map formation does not require the  
 143 pre-specification of center-points by as yet undetermined additional developmental mechanisms.

## 144 Materials & Methods

145 The cortical sheet was modelled as a two dimensional hexagonal lattice, which simplifies the com-  
 146 putation of the 2D Laplacian. Within a boundary traced around the edge of a rat barrel field (Fig. 1A)  
 147 we set the hex-to-hex distance  $d$  to 0.03 mm, which resulted in a lattice containing 6515 hexes for  
 148 the simulations shown in Figs. 1A,C & D and 12739 hexes for the Fgf8 misexpression study shown  
 149 in Fig. 1E. Each hex contained 82 time-dependent variables: 41 branching densities ( $a_i$ ) and 41 con-  
 150 nection densities ( $c_i$ ). The rate of change of each of the time-dependent variables (Eqs. 1 & 2)  
 151 was computed using a fourth-order Runge-Kutta method.

152 The most involved part of this computation is to find the divergence of the flux of axonal branch-  
 153 ing,  $\mathbf{J}_i(\mathbf{x}, t)$ , the term in parentheses in Eq. 2:

$$\nabla \cdot \mathbf{J}_i(\mathbf{x}, t) = \nabla \cdot \left( D \nabla a_i - a_i \sum_{j=1}^M \gamma_{i,j} \nabla \rho_j(\mathbf{x}) \right). \quad (5)$$

154 Note that the sum of the guidance gradients is time-independent and define  $\mathbf{g}_i(\mathbf{x}) \equiv \sum_{j=1}^M \gamma_{i,j} \nabla \rho_j(\mathbf{x})$ .  
 155 Because the divergence operator is distributive, Eq. 5 can be expanded using vector calculus iden-  
 156 tities (dropping references to  $\mathbf{x}$  and  $t$  for clarity):

$$\nabla \cdot \mathbf{J}_i = \nabla \cdot (D \nabla a_i) - \nabla \cdot (a_i \mathbf{g}_i). \quad (6)$$

157 Applying the vector calculus product rule identity yields

$$\nabla \cdot \mathbf{J}_i = D \nabla \cdot \nabla a_i - a_i \nabla \cdot \mathbf{g}_i - \mathbf{g}_i \cdot \nabla a_i, \quad (7)$$

158 which has three elements to compute: i)  $D \nabla \cdot \nabla a_i$  (the Laplacian of  $a_i$ ); ii) a time-independent mod-  
 159 ulator of  $a_i$  (because  $\nabla \cdot \mathbf{g}_i$  is a time-independent static field); and iii) the scalar product of the static  
 160 vector field  $\mathbf{g}_i$  and the gradient of  $a_i$ . Each of the divergences can be simplified by means of Gauss's  
 161 Theorem following *Lee et al. (2014)*.

162 (i) The computation of the mean value of the Laplacian across one hexagon of area  $\Omega = \frac{\sqrt{3}}{2} d^2$ ,

163 located at position  $\mathbf{p}_0$ , with neighbours at positions  $\mathbf{p}_1$ - $\mathbf{p}_6$  is

$$\begin{aligned}
 \langle D\nabla \cdot \nabla a_i(\mathbf{p}_0, t) \rangle &= \frac{1}{\Omega} \oint_{\partial\Omega} \nabla \cdot \nabla a_i(\mathbf{x}, t) d\Omega = \frac{1}{\Omega} \oint \frac{\partial a_i}{\partial \hat{\mathbf{n}}} d\gamma \\
 &\approx \frac{1}{\Omega} \sum_{j=1}^6 \left. \frac{\partial a_i(\mathbf{p}_j)}{\partial \hat{\mathbf{n}}} \right|_{\text{mid}} v \\
 &= \frac{2}{\sqrt{3}d^2} \sum_{j=1}^6 \frac{a_i(\mathbf{p}_j) - a_i(\mathbf{p}_0)}{d} \frac{d}{\sqrt{3}} \\
 &= \frac{2}{3d^2} \sum_{j=1}^6 (a_i(\mathbf{p}_j) - a_i(\mathbf{p}_0)),
 \end{aligned} \tag{8}$$

164 where  $v = d/\sqrt{3}$  is the length of each edge of the hexagon and  $d\gamma$  is an infinitesimally small distance  
 165 along its perimeter.

166 ii) The computation of the second term in Eq. 7,  $\langle a_i(\mathbf{p}_0, t) \nabla \cdot \mathbf{g}_i(\mathbf{p}_0) \rangle$ , can be written out similarly:

$$\begin{aligned}
 \frac{1}{\Omega} \oint_{\partial\Omega} a_i \nabla \cdot \mathbf{g}_i d\Omega &= \frac{a_i(\mathbf{p}_0, t)}{\Omega} \oint \mathbf{g}_i \cdot d\hat{\mathbf{n}} \\
 &\approx \frac{a_i(\mathbf{p}_0, t)}{\Omega} \sum_{j=1}^6 \frac{\mathbf{g}_i(\mathbf{p}_j) + \mathbf{g}_i(\mathbf{p}_0)}{2} \cdot \hat{\mathbf{n}} v \\
 &= \frac{2a_i(\mathbf{p}_0, t)v}{\sqrt{3}d^2} \sum_{j=1}^6 \left[ \frac{g_i^x(\mathbf{p}_j) + g_i^x(\mathbf{p}_0)}{2} \cdot \hat{\mathbf{n}} + \frac{g_i^y(\mathbf{p}_j) + g_i^y(\mathbf{p}_0)}{2} \cdot \hat{\mathbf{n}} \right] \\
 \Rightarrow \langle a_i(\mathbf{p}_0, t) \nabla \cdot \mathbf{g}_i(\mathbf{p}_0) \rangle &\approx \frac{a_i(\mathbf{p}_0, t)}{3d} \sum_{j=1}^6 \left[ (g_i^x(\mathbf{p}_j) + g_i^x(\mathbf{p}_0)) \cos\left(\frac{\pi}{3}(j-1)\right) + (g_i^y(\mathbf{p}_j) + g_i^y(\mathbf{p}_0)) \sin\left(\frac{\pi}{3}(j-1)\right) \right],
 \end{aligned} \tag{9}$$

167 where  $g_i^x$  and  $g_i^y$  are the Cartesian components of  $\mathbf{g}_i$ . Both this last expression, and the final ex-  
 168 pression of Eq. 8 can be computed locally, by summing over values of the nearest neighbours.

169 iii) The final term in Eq. 7 is the scalar product of two vector fields which is straightforward to  
 170 compute from their Cartesian components.

171 By separating the computation of Eq. 5 into parts (i), (ii) & (iii), the no-flux boundary condition,  
 172  $\mathbf{J}_i(\mathbf{x}, t)|_{\text{boundary}} = 0$ , can be fulfilled. On the boundary, the contribution to  $\mathbf{J}$  resulting from the first  
 173 term of Eq. 7 can be fixed to 0 by the 'ghost cell method' in which, during the evaluation of (i), a  
 174 hex outside the boundary containing the same value as the hex inside the boundary is imagined  
 175 to exist such that the flux of  $\mathbf{J}$  across the boundary is 0. Then,  $\mathbf{g}_i(\mathbf{x})$  can be tailored so that it, and its  
 176 normal derivative approach 0 at the boundary, ensuring that the second and third terms of Eq. 7  
 177 also contribute nothing to  $\mathbf{J}$ . This is achieved by applying to  $\mathbf{g}_i(\mathbf{x})$  a sharp logistic function of the  
 178 distance from  $\mathbf{x}$  to the boundary.

179 All code required to reproduce these results is available at [https://github.com/ABRG-Models/](https://github.com/ABRG-Models/BarrelEmerge/tree/eLife_submission1)  
 180 [BarrelEmerge/tree/eLife\\_submission1](https://github.com/ABRG-Models/BarrelEmerge/tree/eLife_submission1). The computations described in (i), (ii) and (iii) may be found in  
 181 the class method `RD_James::compute_divJ()` which calculates term1, term2 and term3, respectively.

## 182 **Movie S1 caption**

183 Movie corresponding to Fig. 1C in the main paper. Simulation parameters were  $N = 41$ ,  $\alpha = 3$ ,  
 184  $\beta = 20$ ,  $k = 3$ ,  $D = 0.2$ ,  $\gamma \in \pm 2$ ,  $\epsilon = 150$  and  $\delta t = 0.0001$ . Colours indicate the thalamic projection for  
 185 which the connection density is maximal, black lines delineate boundaries, and overlaid contours  
 186 show  $c > 0.5$ . The final frame in the movie is step 25,000 of the simulation.



## 187 Acknowledgments

188 The authors thank Jason Berwick at the University of Sheffield for advice and for access to the  
189 rat barrel stains used to construct Fig. 1A. This work was supported by a Collaborative Activity  
190 Award, *Cortical Plasticity Within and Across Lifetimes*, from the James S. McDonnell Foundation (grant  
191 220020516).

## 192 References

- 193 **Agmon A**, Yang LT, O'Dowd DK, Jones EG. Organized growth of thalamocortical axons from the deep tier of ter-  
194 minations into layer IV of developing mouse barrel cortex. *Journal of Neuroscience*. 1993 Dec; 13(12):5365-  
195 5382. <http://www.jneurosci.org/content/13/12/5365>, doi: 10.1523/JNEUROSCI.13-12-05365.1993.
- 196 **Antón-Bolaños N**, Sempere-Ferràndez A, Guillamón-Vivancos T, Martini FJ, Pérez-Saiz L, Gezelius H, Filipchuk A,  
197 Valdeolmillos M, López-Bendito G. Prenatal activity from thalamic neurons governs the emergence of func-  
198 tional cortical maps in mice. *Science*. 2019 Jun; 364(6444):987-990. [https://science.sciencemag.org/content/](https://science.sciencemag.org/content/364/6444/987)  
199 [364/6444/987](https://science.sciencemag.org/content/364/6444/987), doi: 10.1126/science.aav7617.
- 200 **Armstrong-James M**, Fox K, Das-Gupta A. Flow of excitation within rat barrel cortex on striking a single vib-  
201 rissa. *Journal of Neurophysiology*. 1992 Oct; 68(4):1345-1358. [https://www.physiology.org/doi/abs/10.1152/](https://www.physiology.org/doi/abs/10.1152/jn.1992.68.4.1345)  
202 [jn.1992.68.4.1345](https://www.physiology.org/doi/abs/10.1152/jn.1992.68.4.1345), doi: 10.1152/jn.1992.68.4.1345.
- 203 **Assimacopoulos S**, Kao T, Issa NP, Grove EA. Fibroblast Growth Factor 8 Organizes the Neocortical Area Map  
204 and Regulates Sensory Map Topography. *Journal of Neuroscience*. 2012 May; 32(21):7191-7201. [http://www.](http://www.jneurosci.org/content/32/21/7191)  
205 [jneurosci.org/content/32/21/7191](http://www.jneurosci.org/content/32/21/7191), doi: 10.1523/JNEUROSCI.0071-12.2012.
- 206 **Bishop KM**, Goudreau G, O'Leary DDM. Regulation of Area Identity in the Mammalian Neocortex by Emx2  
207 and Pax6. *Science*. 2000 Apr; 288(5464):344-349. <http://science.sciencemag.org/content/288/5464/344>, doi:  
208 [10.1126/science.288.5464.344](http://science.sciencemag.org/content/288/5464/344).
- 209 **Erzurumlu RS**, Gaspar P. Development and critical period plasticity of the barrel cortex: Barrel cortex plasticity.  
210 *European Journal of Neuroscience*. 2012 May; 35(10):1540-1553. [http://doi.wiley.com/10.1111/j.1460-9568.](http://doi.wiley.com/10.1111/j.1460-9568.2012.08075.x)  
211 [2012.08075.x](http://doi.wiley.com/10.1111/j.1460-9568.2012.08075.x), doi: 10.1111/j.1460-9568.2012.08075.x.
- 212 **Haidarliu S**, Ahissar E. Size gradients of barreloids in the rat thalamus. *Journal of Comparative Neurology*.  
213 2001; 429(3):372-387. [https://onlinelibrary.wiley.com/doi/abs/10.1002/1096-9861%2820010115%29429%](https://onlinelibrary.wiley.com/doi/abs/10.1002/1096-9861%2820010115%29429%3A3%3C372%3A%3AAID-CNE2%3E3.0.CO%3B2-3)  
214 [3A3%3C372%3A%3AAID-CNE2%3E3.0.CO%3B2-3](https://onlinelibrary.wiley.com/doi/abs/10.1002/1096-9861%2820010115%29429%3A3%3C372%3A%3AAID-CNE2%3E3.0.CO%3B2-3), doi: 10.1002/1096-9861(20010115)429:3<372::AID-  
215 [CNE2>3.0.CO;2-3](https://onlinelibrary.wiley.com/doi/abs/10.1002/1096-9861%2820010115%29429%3A3%3C372%3A%3AAID-CNE2%3E3.0.CO%3B2-3).
- 216 **Karbowski J**, Ermentrout GB. Model of the Early Development of Thalamo-Cortical Connections and Area  
217 Patterning via Signaling Molecules. *Journal of Computational Neuroscience*. 2004 Nov; 17(3):347-363. [http://](http://link.springer.com/10.1023/B:JCNS.0000044876.28268.18)  
218 [link.springer.com/10.1023/B:JCNS.0000044876.28268.18](http://link.springer.com/10.1023/B:JCNS.0000044876.28268.18), doi: 10.1023/B:JCNS.0000044876.28268.18.
- 219 **Lee D**, Tien HC, Luo CP, Luk HN. Hexagonal grid methods with applications to partial differential equations.  
220 *International Journal of Computer Mathematics*. 2014 Sep; 91(9):1986-2009. [http://www.tandfonline.com/](http://www.tandfonline.com/doi/abs/10.1080/00207160.2013.864392)  
221 [doi/abs/10.1080/00207160.2013.864392](http://www.tandfonline.com/doi/abs/10.1080/00207160.2013.864392), doi: 10.1080/00207160.2013.864392.
- 222 **Ma PM**. The barrelettes—architectonic vibrissal representations in the brainstem trigeminal complex of the  
223 mouse. Normal structural organization. *Journal of Comparative Neurology*. 1991; 309(2):161-199. [https://](https://onlinelibrary.wiley.com/doi/abs/10.1002/cne.903090202)  
224 [onlinelibrary.wiley.com/doi/abs/10.1002/cne.903090202](https://onlinelibrary.wiley.com/doi/abs/10.1002/cne.903090202), doi: 10.1002/cne.903090202.
- 225 **Miller K**, Kolk SM, Donoghue MJ. EphA7-ephrin-A5 signaling in mouse somatosensory cortex: Develop-  
226 mental restriction of molecular domains and postnatal maintenance of functional compartments. *The*  
227 *Journal of Comparative Neurology*. 2006 Jun; 496(5):627-642. <http://doi.wiley.com/10.1002/cne.20926>, doi:  
228 [10.1002/cne.20926](http://doi.wiley.com/10.1002/cne.20926).
- 229 **Purves D**, Riddle DR, LaMantia AS. Iterated patterns of brain circuitry (or how the cortex gets its spots). *Trends*  
230 *in Neurosciences*. 1992 Jan; 15(10):362-368. <https://linkinghub.elsevier.com/retrieve/pii/016622369290180G>,  
231 doi: 10.1016/0166-2236(92)90180-G.
- 232 **Senft SL**, Woolsey TA. Mouse Barrel Cortex Viewed as Dirichlet Domains. *Cerebral Cortex*. 1991; 1(4):348-363.  
233 <https://academic.oup.com/cercor/article-lookup/doi/10.1093/cercor/1.4.348>, doi: 10.1093/cercor/1.4.348.
- 234 **Shimogori T**, Grove EA. Fibroblast Growth Factor 8 Regulates Neocortical Guidance of Area-Specific Thalamic  
235 Innervation. *Journal of Neuroscience*. 2005 Jul; 25(28):6550-6560. [http://www.jneurosci.org/content/25/28/](http://www.jneurosci.org/content/25/28/6550)  
236 [6550](http://www.jneurosci.org/content/25/28/6550), doi: 10.1523/JNEUROSCI.0453-05.2005.

- 237 **Sperry RW.** Chemoaffinity in the Orderly Growth of Nerve Fiber Patterns and Connections. Proceedings of  
238 the National Academy of Sciences. 1963 Oct; 50(4):703-710. <https://www.pnas.org/content/50/4/703>, doi:  
239 [10.1073/pnas.50.4.703](https://doi.org/10.1073/pnas.50.4.703).
- 240 **Van Der Loos H.** Barreloids in mouse somatosensory thalamus. Neuroscience Letters. 1976 Mar; 2(1):1-6.  
241 <http://www.sciencedirect.com/science/article/pii/0304394076900367>, doi: 10.1016/0304-3940(76)90036-7.
- 242 **Vanderhaeghen P,** Lu Q, Prakash N, Frisé J, Walsh CA, Frostig RD, Flanagan JG. A mapping label required  
243 for normal scale of body representation in the cortex. Nature Neuroscience. 2000 Apr; 3(4):358-365. [https://www.nature.com/articles/nn0400\\_358](https://www.nature.com/articles/nn0400_358), doi: 10.1038/73929.  
244
- 245 **Woolsey TA,** Van der Loos H. The structural organization of layer IV in the somatosensory region (S I) of  
246 mouse cerebral cortex: The description of a cortical field composed of discrete cytoarchitectonic units. Brain  
247 Research. 1970 Jan; 17(2):205-242. <http://www.sciencedirect.com/science/article/pii/000689937090079X>, doi:  
248 10.1016/0006-8993(70)90079-X.
- 249 **Woolsey TA,** Welker C, Schwartz RH. Comparative anatomical studies of the Sml face cortex with special refer-  
250 ence to the occurrence of "barrels" in layer IV. The Journal of Comparative Neurology. 1975 Nov; 164(1):79-94.  
251 <http://doi.wiley.com/10.1002/cne.901640107>, doi: 10.1002/cne.901640107.
- 252 **Zheng Y,** Johnston D, Berwick J, Mayhew J. Signal Source Separation in the Analysis of Neural Activity in Brain.  
253 NeuroImage. 2001 Mar; 13(3):447-458. <https://linkinghub.elsevier.com/retrieve/pii/S1053811900907055>, doi:  
254 [10.1006/nimg.2000.0705](https://doi.org/10.1006/nimg.2000.0705).
